STUDY PROTOCOL

# Assessing the reduction of viral infectivity in HPV16/18-positive women after one, two, and three doses of Gardasil-9 (RIFT): Study protocol

Victoria López-Codony <sup>1,2</sup>✉, Álvaro de Andrés-Pablo<sup>1,2</sup>✉, Angelica Ferrando-Díez<sup>3</sup>✉, Maria Eulàlia Fernández-Montolí<sup>4</sup>, Marta López-Querol <sup>1</sup>, Sara Tous <sup>1,5</sup>, Carlos Ortega-Expósito<sup>4</sup>, Juan Carlos Torrejón-Becerra<sup>4</sup>, Yolanda Pérez<sup>4</sup>, Anna Ferrer-Artola <sup>6</sup>, Josep Maria Sole-Sedeno <sup>7</sup>, Clara Grau<sup>8</sup>, Blas Rupérez<sup>8</sup>, Maria Saumoy<sup>9</sup>, Mónica Sánchez<sup>9</sup>, Paula Peremiquel-Trillas <sup>1,2,5</sup>, Laia Bruni<sup>1,5</sup>‡, Laia Alemany<sup>1,5</sup>, Francesc Xavier Bosch<sup>1,5,10</sup>‡, Miquel Angel Pavón <sup>1,5</sup>‡\*

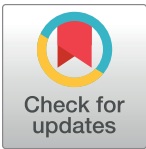

**1** Catalan Institute of Oncology, Bellvitge Biomedical Research Institute (IDIBELL), Cancer Epidemiology Research Programme, L'Hospitalet de Llobregat, Barcelona, Spain, **2** Programa de Doctorat en Biomedicina, Universitat de Barcelona (UB), Barcelona, Spain, **3** Medical Oncology Department, Catalan Institute of Oncology, Germans Trias i Pujol University Hospital (HGTiP), Badalona, Barcelona, Spain, **4** Department of Gynaecology, Bellvitge University Hospital (HUB), L'Hospitalet de Llobregat, Barcelona, Spain, **5** Biomedical Research Networking Center for Epidemiology and Public Health (CIBERESP), Madrid, Spain, **6** Bellvitge Biomedical Research Institute (IDIBELL), Pharmacy Unit, Bellvitge University Hospital (HUB), L'Hospitalet de Llobregat, Barcelona, Spain, **7** Department of Obstetrics and Gynaecology, Hospital del Mar–Mar Health Park, Barcelona, Spain, **8** Sexual and Reproductive Health Care Center–ASSIR, Delta del Llobregat, Barcelona, Spain, **9** HIV and STD Unit, Bellvitge University Hospital (HUB), Bellvitge Biomedical Research Institute (IDIBELL), L'Hospitalet de Llobregat, Barcelona, Spain, **10** Faculty of Health Sciences, Open University of Catalonia (UOC), Barcelona, Spain

✉ These authors contributed equally to this work.  
 ‡ These authors also contributed equally to this work.  
 \* mpavon@iconcologia.net

 OPEN ACCESS

**Citation:** López-Codony V, de Andrés-Pablo Á, Ferrando-Díez A, Fernández-Montolí ME, López-Querol M, Tous S, et al. (2024) Assessing the reduction of viral infectivity in HPV16/18-positive women after one, two, and three doses of Gardasil-9 (RIFT): Study protocol. PLoS ONE 19(5): e0304080. <https://doi.org/10.1371/journal.pone.0304080>

**Editor:** Diane M. Harper, University of Michigan, UNITED STATES

**Received:** January 10, 2024

**Accepted:** April 30, 2024

**Published:** May 20, 2024

**Copyright:** © 2024 López-Codony et al. This is an open access article distributed under the terms of the [Creative Commons Attribution License](https://creativecommons.org/licenses/by/4.0/), which permits unrestricted use, distribution, and reproduction in any medium, provided the original author and source are credited.

**Data Availability Statement:** No datasets were generated or analysed during the current study. Upon completion of the study, data underlying the findings will be made publicly available in the Spanish Clinical Studies Registry (REec), as well as the ClinicalTrials.gov database, where it is registered.

**Funding:** We thank CERCA Programme/ Generalitat de Catalunya for institutional support.

## Abstract

Human Papillomavirus (HPV) prophylactic vaccination has proven effective in preventing new infections, but it does not treat existing HPV infections or associated diseases. Hence, there is still an important reservoir of HPV in adults, as vaccination programs are mainly focused on young women. The primary objective of this non-randomized, open-label trial is to evaluate if a 3-dose regimen of Gardasil-9 in HPV16/18-positive women could reduce the infective capacity of their body fluids. We aim to assess if vaccine-induced antibodies could neutralize virions present in the mucosa, thus preventing the release of infective particles and HPV transmission to sexual partners. As our main endpoint, the E1<sup>+</sup>E4-HaCaT model will be used to assess the infectivity rate of cervical, anal and oral samples, obtained from women before and after vaccination. HPV DNA positivity, virion production, seroconversion, and the presence of antibodies in the exudates, will be evaluated to attribute infectivity reduction to vaccination. Our study will recruit two different cohorts (RIFT-HPV1 and RIFT-HPV2) of non-vaccinated adult women. RIFT-HPV1 will include subjects with an HPV16/18 positive cervical test and no apparent cervical lesions or cervical lesions eligible for conservative treatment. RIFT-HPV2 will include subjects with an HPV16/18 positive anal test and

This study has been funded by Instituto de Salud Carlos III through the projects [CIBERESP CB06/02/0073, FI18/00244 and PI20/01819] (Co-funded by European Social Fund investing in your future/ European Regional Development Fund - a way to build Europe) and MSD [IISP 60552 (RIFT2), IISP 59383 (RIFT1)]. This work was also supported by the Secretariat for Universities and Research of the Ministry of Business and Knowledge of the Government of Catalonia (2021SGR01354/2021SGR01029). One of these entities had any additional role in the study design, data collection and analysis, decision to publish, or preparation of the manuscript, nor alter our adherence to PLOS ONE policies on sharing data and materials.

**Competing interests:** I have read the journal's policy and the authors of this manuscript have the following competing interests: The Cancer Epidemiology Research Program from Catalan Institute of Oncology (ICO-IDIBELL) has received sponsorship/grants and free reagents from MSD, Roche, GSK, IDT, Hologic and Seegene, as well as structural funds from CIBERESP and the Government of Catalonia. None of these entities had any additional role in the study design, data collection and analysis, decision to publish, or preparation of the manuscript, nor alter our adherence to PLOS ONE policies on sharing data and materials.

no apparent anal lesions or anal lesions eligible for conservative treatment, as well as women with an HPV16/18 positive cervical test and HPV-associated vulvar lesions. Subjects complying with inclusion criteria for both cohorts will be recruited to the main cohort, RIFT-HPV1. Three doses of Gardasil-9 will be administered intramuscularly at visit 1 (0 months), visit 2 (2 months) and visit 3 (6 months). Even though prophylactic HPV vaccines would not eliminate a pre-existing infection, our results will determine if HPV vaccination could be considered as a new complementary strategy to prevent HPV-associated diseases by reducing viral spread.

**Trial registration:** <https://clinicaltrials.gov/ct2/show/NCT05334706>.

## Introduction

Worldwide, more than 610,000 cancer cases are annually attributed to Human Papillomavirus (HPV), including most cervical cancers and several anogenital (vulvar, vaginal, penile, and anal) and oropharyngeal cancers [1,2]. Out of all the HPV genotypes, HPV16 is the most carcinogenic type and both HPV16 and HPV18 are responsible for more than 70% of cervical cancers [1,2].

The 9vHPV vaccine (Gardasil-9) consists of highly purified virus-like particles (VLPs) of the recombinant major capsid (L1) protein of HPV Types 6, 11, 16, 18, 31, 33, 45, 52, and 58 [3]. The mechanism of protection has not been fully elucidated but it is largely accepted that vaccine-induced neutralizing antibodies (nAbs) play a crucial role in preventing the binding of virions to the epithelial cell surface, inhibiting the initiation of a new viral infection [4,5]. Moreover, it has been demonstrated that nAbs-labelled virions are targeted for proteasomal degradation by tripartite motif-containing protein 21 (*TRIM21*) [6]. Therefore, when HPV is transmitted to a vaccinated person, vaccine-induced nAbs can recognise and neutralize HPV virions, thus preventing epithelial infection. However, if the infection was acquired before vaccination, nAbs will not be able to eliminate infected cells.

Given that L1-VLP vaccines are prophylactic and not therapeutic, HPV vaccination programs are mainly aimed at adolescents before their first sexual encounter [7]. By excluding adults from vaccination strategies, individuals with a productive infection become an important reservoir of HPV, facilitating transmission to new individuals and HPV perpetuation in the population [8]. It has been demonstrated that anti-L1 nAbs are present in cervical and oral fluids, as well as in first-void urine samples, after seroconversion [9–20]. This suggests that in seroconverted individuals with a productive infection anti-L1 nAbs could interact with HPV virions, potentially neutralizing their infectivity [21]. Considering vaccine-induced antibody responses are significantly higher than natural serological responses, vaccination could enhance virion neutralization, limiting HPV transmission [21,22]. Based on this, recent vaccine trials have set out to evaluate if late vaccination could reduce HPV transmission [23–26]. An evaluation of recently formed heterosexual couples from the HITCH prospective study showed that HPV transmission to their respective partners was significantly reduced in vaccinated women ranging from 18 to 24 years old [23,24]. Moreover, a lower viral load was observed in vaccinated women with HPV6/11/16/18 infections, when compared to unvaccinated women [23]. However, the preliminary results of the following interventional clinical trial, TRAP-HPV, showed inconclusive evidence regarding if HPV vaccination could reduce transmission and in turn protect sex partners from new vaccine-preventable infections [25,26].

Given the complexity and potential biases that come with clinical trials involving couples, our study takes on a new perspective that focuses on infectivity, instead of transmission to sexual partners. We aim to assess if transudated nAbs in the epithelial mucosa, as a result of vaccination, could neutralize the virions released from infected cells, thus preventing new infections and HPV transmission. Here, we propose a method to measure HPV infectivity based on the *in vitro* infection of human keratinocytes cells (HaCaT) and the subsequent expression of the HPV E1<sup>E4</sup> spliced transcript. E1<sup>E4</sup> mRNA is a surrogate marker of viral machinery activation, allowing us to evaluate the number of keratinocytes that have been infected [27–32]. Using this E1<sup>E4</sup>-HaCaT model, our study sets out to evaluate if a 3-dose regimen of Gardasil-9 could reduce the infective capacity of body fluids from HPV16/18-positive women.

## Materials and methods

### Study design and setting

This non-randomized, open-label trial will assess if vaccination with a 3-dose regimen of Gardasil-9 could neutralize HPV virions and reduce the infectivity of body fluids (cervical, anal and oral) from HPV16/18-positive women. The primary objective will be to evaluate infectivity reduction in body fluids after 3-doses of Gardasil-9. The main endpoint will be to evaluate the *in vitro* infectivity rate, together with complementary endpoints such as HPV DNA detection and genotyping, HPV16/18 virion detection and anti-HPV L1 detection in body fluids. The secondary objective will be to analyse anti-HPV L1 antibody titration in serum before and after vaccination. The tertiary objective will be to evaluate the infectivity reduction after 1 or 2-doses of Gardasil-9, using the same endpoints as in the primary objective. The study is lead by the Cancer Epidemiology Research Program (PREC) at the Catalan Institute of Oncology (ICO) and subject recruitment is conducted at the Gynaecology Unit of Bellvitge University Hospital (HUB), both in L'Hospitalet del Llobregat, Barcelona. Four satellite sites—Obstetrics and Gynaecology Department of Hospital del Mar at Mar Health Park in Barcelona; Sexual and Reproductive Health Care Center (ASSIR) in Delta del Llobregat, Barcelona; HIV and STD Unit at HUB; and Cervical Cancer Screening Technical Office at ICO—will identify and refer potential candidates. More details can be found in the original protocol version (S1 and S2 Files).

### Study population and recruitment criteria

The trial population will be composed of non-vaccinated adult women (18 years or older) positive for HPV16 and/or HPV18. A minimum of 39 and 30 subjects will be enrolled in two different study cohorts, RIFT-HPV1 and RIFT-HPV2, respectively. The RIFT-HPV1 cohort, which aims to measure cervical sample infectivity, will include adult women with an HPV16 and/or HPV18 positive cervical test and no apparent cervical lesions or cervical intraepithelial neoplasia (CIN) 1/2 lesions, eligible for conservative treatment. Alternatively, the RIFT-HPV2 cohort, which aims to measure anal sample infectivity, will include adult women with an HPV16 and/or HPV18 positive anal test and no apparent anal lesions or anal lesions eligible for conservative treatment. Additionally, the RIFT-HPV2 cohort will also include adult women with an HPV16 and/or HPV18 positive cervical test and HPV-associated vulvar lesions that would have been excluded from the RIFT-HPV1 cohort due to the need for surgical treatment. Although this cohort can overlap with the RIFT-HPV1 cohort, it will allow us to enrich the number of subjects with anal infection, reaching the sample size needed to evaluate vaccination impact on anal mucosa infectivity. In the event of identifying subjects that comply with inclusion criteria for both cohorts, they will be recruited to the main cohort, RIFT-HPV1. The

impact of vaccination on cervical sample infectivity will be measured in patients included in RIFT-HPV1 cohort where cervical mucosa will not be altered by any surgical procedures. Alternatively, the vaccination impact on anal sample infectivity will be measured combining data from both cohorts, including all those women with an HPV16 and/or HPV18 positive anal test and no anal lesions or anal lesions that have not undergone any surgical treatment that could alter the anal mucosa. Recruitment started on September 13, 2022 and the overall study will end when the last subject completes the last study-related telephone-call or visit, withdraws from the study, or is lost to follow-up.

**Inclusion criteria.** To be eligible for the study, subjects must be adult women participating at cervical cancer screening or attending a routine gynaecological outpatient visit. They must be positive for HPV16, 18 or double-positive for 16 and 18; have been recently diagnosed for their HPV-positivity (within the last 10 months); and meet one of the previously stated criteria from RIFT-HPV1 or RIFT-HPV2 cohorts. Coinfection with other non HPV16/18 types, as well as history of cervical surgery, condyloma acuminata, HIV, transplant immunosuppression or an autoimmune disease, will not be considered exclusion criteria.

**Exclusion criteria.** Reasons for exclusion from the study include any cervical (RIFT-HPV1) or anal (RIFT-HPV2) lesion that requires clinical intervention within 7 months, history of severe allergic reaction or known allergy to any vaccine component, thrombocytopenia or any coagulation disorder, splenectomy, anogenital cancer or HPV-related head and neck cancer, pregnancy, previous receipt of any HPV vaccine, receipt of any immune globulin product or blood-derived product 3 months prior to the Day 1, receipt of inactivated or recombinant vaccines within 14 days prior to Day 1, or live vaccines within 21 days prior to Day 1.

**Discontinuation criteria.** Subjects may discontinue vaccination at any time for any reason or be discontinued at the discretion of the Investigator should any untoward effect occur. In addition, a subject may be discontinued by the Investigator or the Sponsor if study vaccination is inappropriate, the study plan is violated, or for administrative and/or other safety reasons. Discontinued subjects may resume the study vaccination regime if considered clinically safe and appropriate by the Investigator. Given that certain data beyond study treatment discontinuation may be important to the study, subjects will continue to be monitored after discontinuing treatment.

## Study procedures

All enrolled subjects will complete the specified procedures in four visits (0, 2, 6, 7 months) (Fig 1). A pregnancy test will be performed on a urine sample in all four visits, before receiving any vaccine or collecting any other sample.

**Study questionnaire.** Study subjects will be required to answer a short questionnaire in all four visits, containing 10 questions regarding previous and current health status, HPV infections and vaccination, contraception use and sexual activity (S3 File).

**Vaccine administration.** Intramuscular Gardasil-9 vaccine will be administered as a 3-dose regimen in visits 1 to 3 by a qualified health professional following manufacturer's protocol. Visits 2 and 3 will have an administration window period of  $\pm 3$  and  $\pm 4$  weeks, respectively.

**Sample collection.** A set of different samples, including cervical, anal, vulvar, oral, urine and blood samples, will be collected in visits 1 to 3, before vaccine administration, and in visit 4. Cervical samples will be collected using a Cervex-Brush® (Rovers Medical Devices B.V., North Brabant, Netherlands), which will be immediately immersed in a sterile collection tube containing 10 ml of phosphate-buffered saline (PBS). Anal samples will be collected using an endocervical brush (Bexen Medical, Gipuzkoa, Spain) and immediately immersed in 5 ml of

|                                                                  | STUDY PERIOD |                       |                       |                          |
|------------------------------------------------------------------|--------------|-----------------------|-----------------------|--------------------------|
|                                                                  | Visit 1      | Visit 2               | Visit 3               | Visit 4                  |
| TIMEPOINT                                                        | Day 1        | Month 2<br>(±3 weeks) | Month 6<br>(±4 weeks) | Month 7<br>(-3/+7 weeks) |
| <b>ENROLMENT</b>                                                 |              |                       |                       |                          |
| Eligibility screen                                               | X            |                       |                       |                          |
| Informed consent                                                 | X            |                       |                       |                          |
| <b>INTERVENTIONS</b>                                             |              |                       |                       |                          |
| Urine hCG pregnancy test                                         | X            | X                     | X                     | X                        |
| Temperature measurement                                          | X            | X                     | X                     | X                        |
| Questionnaire                                                    | X            | X                     | X                     | X                        |
| Height and weight measurement                                    | X            |                       |                       |                          |
| Medical history and prior/concomitant medication and vaccination | X            | X                     | X                     | X                        |
| Gynaecological examination                                       | X            | X                     | X                     | X                        |
| Cervical sample collection                                       | X            | X                     | X                     | X                        |
| Vulvar sample collection                                         | X            | X                     | X                     | X                        |
| Anal sample collection                                           | X            | X                     | X                     | X                        |
| First-void urine collection                                      | X            | X                     | X                     | X                        |
| Oral sample collection                                           | X            | X                     | X                     | X                        |
| Blood sample collection                                          | X            | X                     | X                     | X                        |
| <b>ASSESSMENTS</b>                                               |              |                       |                       |                          |
| Post-vaccination immediate AE <sup>1</sup>                       | X            | X                     | X                     |                          |
| AE/SAE assessment                                                |              | X                     | X                     | X                        |

**Fig 1. SPIRIT schedule of enrolment, interventions, and assessments.** Abbreviations: hCG = human chorionic gonadotropin; AE = adverse events; SAE = severe adverse events.<sup>1</sup> All subjects will be observed by the Investigator or qualified designee for at least 30 minutes after each study vaccination for any untoward effects, including allergic reactions.

<https://doi.org/10.1371/journal.pone.0304080.g001>

PBS. Vulvar samples will be collected using a viscose collection swab (Deltalab S.L., Barcelona, Spain) which will be immersed in 5 ml of PBS upon arrival. Oral samples will be collected by a 15-second rinse and 15-second gargle with 10 ml of PBS. First-void urine samples will be collected using Colli-Pee® devices (Novosanis NV, Antwerp, Belgium), obtaining around 20ml of urine that will be split into two 15 ml tubes, one containing 4ml of UAS preservative medium (Novosanis NV, Antwerp, Belgium) and the other one empty. Blood samples will be extracted in a red-top vacutainer tube by standard venipuncture procedures and mixed by gently inverting the tube 5 times. Blood tubes will be left for one hour at room temperature for coagulation, after which they will be centrifuged at 1500 g for 10 minutes to separate serum from blood cells. All samples will be aliquoted in 1,5 ml tubes and stored at -80°C, except for a couple of aliquots that will be stored at 4–10°C for immediate usage (infectivity assay and genotyping test).

## Laboratory procedures

**In vitro evaluation of viral infectivity.** The E1<sup>E4</sup>-HaCaT model is a functional assay that will allow us to indirectly quantify the presence of HPV virions in a sample, through the quantification of HPV E1<sup>E4</sup> mRNA expression in HaCaT cells after incubation with the collected specimens (cervical, anal and oral) (Fig 2). Quantification of HPV E1<sup>E4</sup> mRNA levels will be performed using two different gene expression assays: Quantitative reverse transcription PCR (RT-qPCR) and RNAscope *in situ* hybridization (RNAscope ISH). For the RT-qPCR assay, total RNA will be isolated from infected HaCaT cells using the PureLink™ RNA Mini Kit (Thermo Fisher Scientific, Massachusetts, USA) and reverse transcribed to cDNA using the High-Capacity cDNA Reverse Transcription Kit (Thermo Fisher Scientific, Massachusetts, USA). E1<sup>E4</sup> mRNA will then be quantified on a CFX96 instrument (Bio-Rad Laboratories, Inc., California, USA) using TaqMan assays targeting HPV 16/18 E1<sup>E4</sup> (Thermo Fisher Scientific, Massachusetts, USA). For the ISH assay, infected HaCaT cells will be fixed and the RNAscope multiplex fluorescent assay will be performed using HPV 16/18 E1<sup>E4</sup> target probes (Advanced Cell Diagnostics, California, USA). Slides will be visualized under an inverted fluorescent microscope at 20-40X magnification.

**HPV DNA detection and genotyping.** In order to identify subjects undergoing natural clearance or new infections, HPV DNA detection and genotyping will be performed using the Anyplex II HPV28 assay (Seegene, Inc., Seoul, South Korea), identifying up to 28 HPV types (6, 11, 16, 18, 26, 31, 33, 35, 39, 40, 42, 43, 44, 45, 51, 52, 53, 54, 56, 58, 59, 61, 66, 68, 69, 70, 73 and 82), including the vaccine-preventable ones. DNA from cervical, anal and oral samples will be extracted using the automated Maxwell® RSC Tissue DNA Kit (Promega Corporation, Wisconsin, USA) according to manufacturer instructions.

**HPV 16/18 virion detection.** ELISA will be performed as primary method to detect and quantify HPV virions in cervical, anal and oral samples, in order to identify subjects with non-productive infections and distinguish them from subjects with productive infections but reduced infectivity due to vaccination. A sandwich ELISA assay will be used to detect the major capsid protein L1 of HPV 16/18 virions present in exudates of productive infections. Additionally, productive infections may be detected through the identification of virions by electron microscopy (EM), using the bioimaging platform services at Bellvitge Biomedical Research Institute (IDIBELL) [33,34].

**Anti-HPV L1 Ab detection in cervical/anal/oral samples.** ELISA will be performed to quantify anti-HPV L1 Ab against HPV 16 and/or 18 in cervical, anal, and oral samples from subjects, using microtiter plates pre-coated with our control HPV 16/18 PsV. This will enable us to associate the reduction in viral infectivity with the presence of neutralizing antibodies in these fluids.

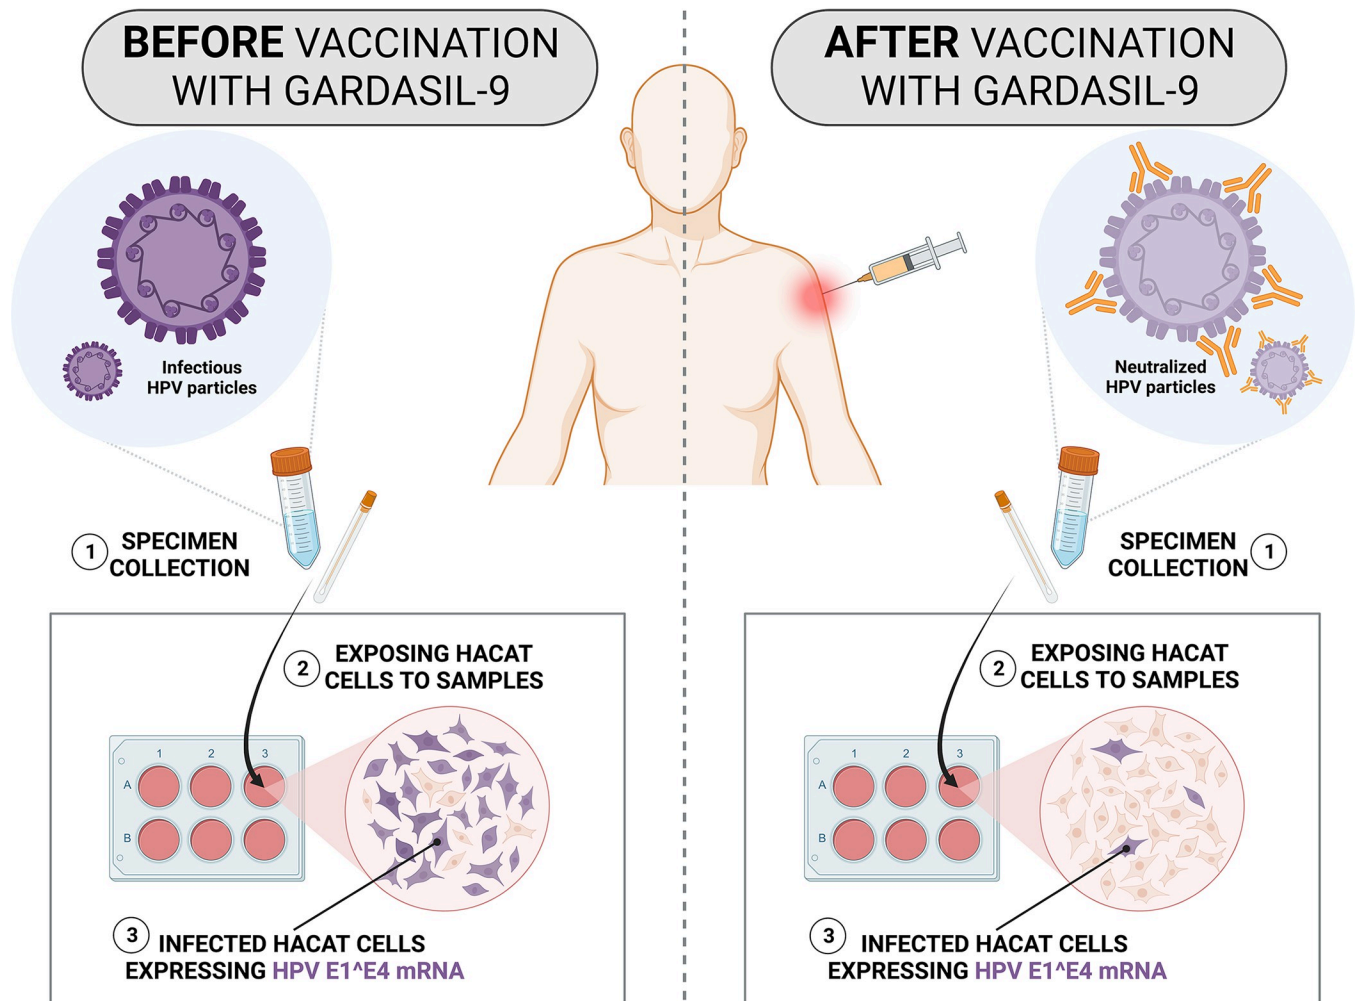

**Fig 2. Infectivity assay performed on HaCaT cells before and after vaccination with Gardasil-9.** Created with [BioRender.com](https://BioRender.com).

<https://doi.org/10.1371/journal.pone.0304080.g002>

**Anti-HPV L1 Ab detection in serum.** Serum samples will be shipped in dry ice to the accredited laboratory by Merck Sharp & Dohme (MSD) for anti-HPV L1 antibody titration (cLIA). The 9-valent HPV cLIA will be used to evaluate specific antibodies against HPV 6, 11, 16, 18, 31, 33, 45, 52, and 58 in serum samples from subjects after each Gardasil-9 dose [35]. This is a standardized technique commonly used in vaccine trials, which will also allow us to identify subjects with natural serological responses before vaccination.

### Study data management

All subjects signing the Informed Consent Form will be given a unique Study Identification Number (SIN), for purposes of identification in all procedures through the study, and anonymization for data analysis. Study database will be kept at all times in the study site's designated digital store/internal server, which will be secured from unauthorized entry. Access will be exclusively permitted to study sponsor and statistician using password encryption. Upon completion of the study, data underlying the findings will be made publicly available in the Spanish Clinical Studies Registry (REec), as well as the ClinicalTrials.gov database, where it is registered.

## Safety considerations

Study subjects will be followed throughout the duration of the study for possible injection-site adverse events (AEs), systemic AEs, serious adverse event (SAEs) and deaths regardless of causality. All AEs and SAEs will be recorded by the study Investigator at each study visit. The Sponsor/representative will prepare and timely submit annual safety reports to the Spanish Agency of Medicines and Medical Devices (AEMPS) and the Clinical Research Ethics Committee of Bellvitge University Hospital (CRE-HUB), for the whole study's duration.

## Statistical analysis

The primary endpoint will be the infectivity rate parameter, which will be measured by quantification of HPV-infected keratinocytes (i.e., expressing E1<sup>E4</sup> mRNA). The quantity of HPV-infected keratinocytes will be directly proportional to the quantity of free HPV virions present in samples (i.e., not neutralized by HPV antibodies). The expression levels of a positive control sample and a housekeeping human gene will be used to normalize the E1<sup>E4</sup> mRNA expression measurements. Differences in the infectivity rate of samples before and after the subject receives the first, second and third dose of Gardasil-9 will be compared using the non-parametric Wilcoxon signed rank test. Significant difference in the infectivity rate will be accepted with a p-value <0.05. ELISA virion detection, ELISA antibody detection and cLIA parameters will be included in the analysis to distinguish the effect of vaccination on the infectivity rate from other characteristics associated with the natural course of the HPV infection. Therefore, cases that after vaccination show a negative HPV16/18 DNA test, absence of HPV16/18 virions, absence of exudated anti-HPV16/18 nAbs and/or absence of seroconversion, will not be included in the analysis population, as well as cases that in visit 1 show a negative HPV16/18 DNA test and/or absence of HPV16/18 virions.

## Sample size and power

The sample size for the RIFT-HPV1 cohort was determined by using as reference the primary variable, which is the reduction in infectivity rates of cervical samples after three doses of Gardasil-9. With a significance level (alpha) of 0.05 and a statistical power (beta) of less than 0.2 in a two-tailed test, it was calculated that a minimum of 39 women receiving the three-dose vaccination regimen is required to detect a difference equal to or greater than a 25% reduction in the infectivity rate of cervical samples. For the RIFT-HPV2 cohort, the sample size was determined by using as reference the reduction in infectivity rates of anal samples after three doses of Gardasil-9. Using the same significance level and statistical power, it was estimated that a minimum of 28 women with an HPV-positive anal sample are needed for the three-dose vaccination schedule to detect a difference equal to or greater than a 35% reduction in the infectivity rate of anal samples. Recognizing that 28 of the women with HPV cervical infections may also have anal infections, 10 out of the 28 individuals included in the analysis will be drawn from the RIFT-HPV1 cohort. Considering that 60% of women showing multiple anogenital infection or with an anal previous positive test will show HPV positivity at study recruitment, we estimated that we need to recruit 30 new subjects in the RIFT-HPV2 cohort to add 18 new individuals in the analysis.

## Ethical considerations

The study protocol version 3.8 (November 11th, 2021), EudraCT number 2021-005229-26, received local Institutional Review Board (IRB) approval by CRE-HUB (AC032/21) on March 4<sup>th</sup>, 2022, as well as AEMPS (MUH/CLIN/EC) approval on March 9<sup>th</sup>, 2022. The current protocol version 4.1 (June 15th, 2023), including the latest amendments, received local IRB



approval by CRE-HUB on October 11<sup>th</sup>, 2023, as well as AEMPS approval on October 17<sup>th</sup>, 2023. The study is being conducted in accordance with the principles of the Declaration of Helsinki, ICH Guidelines for Good Clinical Practice and local legislation (RD 1090/2015), and in full conformity with relevant regulations [36,37]. Written consent will be acquired from each participant upon execution of the Informed Consent Form, following which a distinct SIN will be assigned to ensure anonymity. The list of study subjects' IDs and corresponding SINS will be kept by the study site under strict confidentiality in a secured digital environment. Samples will not be transferred to third parties and will be used in future studies on the diagnosis and prevention of HPV infections and related diseases which have been approved by CRE-HUB. Use of samples for purposes unrelated to those specified in this section will require express re-consent from study subjects.

## Discussion

Given cervical cancer is the fourth most common cancer among women worldwide, causing over 600,000 new cases and 340,000 deaths annually, two major cancer prevention strategies have been developed: primary prevention through prophylactic HPV vaccination, and secondary prevention based on the detection of HPV infections and treatable pre-cancers and early cancers [2,7]. HPV vaccines have not only proved high efficacy in the immunized but have also shown a strong herd effect [38–42]. In fact, girls-only vaccination campaigns have achieved a strong reduction of genital warts in non-vaccinated males from the same age range [40–44]. This phenomenon has been first observed with HPV vaccination given it is the only vaccine solely against a sexually-transmitted infection. These findings highlight the relevance of viral transmission and its impact in the worldwide HPV prevalence amongst sexually active individuals.

The RIFT trial aims to evaluate if a 3-dose regimen of Gardasil-9 could reduce the infective capacity of body fluids from HPV-positive women. This is based on the hypothesis that vaccine-induced antibodies, present in the epithelial mucosa, could neutralize the virions released from infected cells and prevent HPV transmission to sexual partners. In addition, we will also assess if similar outcomes can be observed using a 1- or 2-dose vaccination schedule. Demonstrating that vaccination of HPV carriers can reduce or mitigate transmission would sustain a new indication for vaccination (i.e., all HPV+ women found at routine screening) and a boost to reducing viral circulation. For that matter, exploratory results in that direction would help the rationale for larger trials that could be embedded in the context of routine screening programs that already switched to HPV testing. Furthermore, offering vaccination to HPV carriers at the time of HPV screening may also contribute to the management of these women, that should perceive vaccination as an option to reduce the risk of transmission to her current or future sexual partners.

We anticipate a few limitations in the conduct of this study. One of the setbacks can be that given there is a high percentage of transient HPV infections, which can be naturally cleared, a significant proportion of derived subjects will no longer be HPV positive by the start or during the vaccination schedule. This will result in high exclusion rates, but it has been taken into consideration when designing the study. Another limitation to be considered is that we will be able to measure humoral immunity triggered by vaccination, but we are not taking into account cell-mediated immunity, which could potentially play a role in infectivity reduction. Our dissemination plan includes the communication of obtained results in national and international congresses specialized in HPV pathology and to the general population through institutional communication channels.

Taken altogether, the findings of this study will determine if Gardasil-9 could be considered as a new complementary strategy to prevent HPV-associated diseases, by reducing viral spread. This trial could open the doors for future and bigger clinical trials involving both women and men, in order to generate scientific evidence that supports vaccination of HPV-positive adults.

## Supporting information

### S1 File. SPIRIT checklist.

(PDF)

### S2 File. Clinical study protocol.

(PDF)

### S3 File. Study questionnaire.

(PDF)

## Acknowledgments

The authors would like to acknowledge all the women who will participate in the study, as well as the Clinical Research and Clinical trial Unit (UICEC-IDIBELL) at Bellvitge University Hospital (HUB).

## Author Contributions

**Conceptualization:** Francesc Xavier Bosch, Miquel Angel Pavón.

**Data curation:** Victoria López-Codony, Álvaro de Andrés-Pablo, Marta López-Querol.

**Formal analysis:** Sara Tous.

**Funding acquisition:** Francesc Xavier Bosch, Miquel Angel Pavón.

**Investigation:** Victoria López-Codony, Álvaro de Andrés-Pablo, Angelica Ferrando-Díez, Maria Eulàlia Fernández-Montolí, Marta López-Querol, Sara Tous, Carlos Ortega-Expósito, Yolanda Pérez, Josep Maria Sole-Sedeno, Clara Grau, Maria Saumoy, Mónica Sánchez, Francesc Xavier Bosch, Miquel Angel Pavón.

**Project administration:** Marta López-Querol, Miquel Angel Pavón.

**Writing – original draft:** Victoria López-Codony, Álvaro de Andrés-Pablo, Angelica Ferrando-Díez, Miquel Angel Pavón.

**Writing – review & editing:** Victoria López-Codony, Álvaro de Andrés-Pablo, Angelica Ferrando-Díez, Maria Eulàlia Fernández-Montolí, Marta López-Querol, Sara Tous, Carlos Ortega-Expósito, Juan Carlos Torrejón-Becerra, Yolanda Pérez, Anna Ferrer-Artola, Josep Maria Sole-Sedeno, Clara Grau, Blas Rupérez, Maria Saumoy, Mónica Sánchez, Paula Peremiquel-Trillas, Laia Bruni, Laia Alemany, Francesc Xavier Bosch, Miquel Angel Pavón.

## References

1. Kombe Kombe AJ, Li B, Zahid A, Mengist HM, Bounda GA, Zhou Y, et al. Epidemiology and Burden of Human Papillomavirus and Related Diseases, Molecular Pathogenesis, and Vaccine Evaluation. *Front Public Health* [Internet]. 2021; 8. Available from: <https://www.frontiersin.org/articles/10.3389/fpubh.2020.552028>. <https://doi.org/10.3389/fpubh.2020.552028> PMID: 33553082
2. Singh D, Vignat J, Lorenzoni V, Eslahi M, Ginsburg O, Lauby-Secretan B, et al. Global estimates of incidence and mortality of cervical cancer in 2020: a baseline analysis of the WHO Global Cervical Cancer Elimination Initiative. *Lancet Glob Health* [Internet]. 2023 Feb; 11(2):e197–e206. Available from:

<https://europepmc.org/articles/PMC9848409>. [https://doi.org/10.1016/S2214-109X\(22\)00501-0](https://doi.org/10.1016/S2214-109X(22)00501-0) PMID: 36528031

3. European Medicines Agency. Gardasil 9—Product Information [Internet]. 2018 [cited 2023 Mar 26]. Available from: <https://www.ema.europa.eu/en/medicines/human/EPAR/gardasil-9>.
4. Roden RBS, Stern PL. Opportunities and challenges for human papillomavirus vaccination in cancer. Vol. 18, *Nature Reviews Cancer*. Nature Publishing Group; 2018. p. 240–54. <https://doi.org/10.1038/nrc.2018.13> PMID: 29497146
5. Klasse PJ. Neutralization of Virus Infectivity by Antibodies: Old Problems in New Perspectives. *Adv Biol*. 2014 Sep 9; 2014:1–24. <https://doi.org/10.1155/2014/157895> PMID: 27099867
6. Mallery DL, McEwan WA, Bidgood SR, Towers GJ, Johnson CM, James LC. Antibodies mediate intracellular immunity through tripartite motif-containing 21 (TRIM21). *Proc Natl Acad Sci U S A*. 2010 Nov 16; 107(46):19985–90. <https://doi.org/10.1073/pnas.1014074107> PMID: 21045130
7. Bosch FX, Broker TR, Forman D, Moscicki AB, Gillison ML, Doorbar J, et al. *Comprehensive Control of Human Papillomavirus Infections and Related Diseases*. Vol. 31, *Vaccine*. 2013. p. 11–131.
8. Bosch FX, Robles C, Díaz M, Arbyn M, Baussano I, Clavel C, et al. HPV-FASTER: Broadening the scope for prevention of HPV-related cancer. Vol. 13, *Nature Reviews Clinical Oncology*. Nature Publishing Group; 2016. p. 119–32.
9. Castellsagué X, Muñoz N, Pitisuttithum P, Ferris D, Monsonego J, Ault K, et al. End-of-study safety, immunogenicity, and efficacy of quadrivalent HPV (types 6, 11, 16, 18) recombinant vaccine in adult women 24–45 years of age. *Br J Cancer*. 2011 Jun 28; 105(1):28–37. <https://doi.org/10.1038/bjc.2011.185> PMID: 21629249
10. Kemp TJ, García-Piñeres A, Falk RT, Poncelet S, Dessy F, Giannini SL, et al. Evaluation of systemic and mucosal anti-HPV16 and anti-HPV18 antibody responses from vaccinated women. *Vaccine*. 2008 Jul 4; 26(29–30):3608–16. <https://doi.org/10.1016/j.vaccine.2008.04.074> PMID: 18541349
11. Castle PE, Rodriguez AC, Bowman FP, Herrero R, Schiffman M, Bratti MC, et al. Comparison of Ophthalmic Sponges for Measurements of Immune Markers from Cervical Secretions. *Clin Diagn Lab Immunol*. 2004 Mar; 11(2):399–405. <https://doi.org/10.1128/cdli.11.2.399-405.2004> PMID: 15013994
12. Schwarz TF, Kocken M, Petäjä T, Einstein MH, Spaczynski M, Louwers JA, et al. Correlation between levels of human papillomavirus (HPV)-16 and 18 antibodies in serum and cervicovaginal secretions in girls and women vaccinated with the HPV-16/18 AS04-adjuvanted vaccine. *Hum Vaccin*. 2010 Dec; 6(12):1054–61. <https://doi.org/10.4161/hv.6.12.13399> PMID: 21157180
13. Parker KH, Kemp TJ, Pan Y, Yang Z, Giuliano AR, Pinto LA. Evaluation of HPV-16 and HPV-18 specific antibody measurements in saliva collected in oral rinses and merocel® sponges. *Vaccine*. 2018 May 3; 36(19):2705–11.
14. Hagensee ME, Koutsky LA, Lee SK, Grubert T, Kuypers J, Kiviat NB, et al. Detection of cervical antibodies to human papillomavirus type 16 (HPV-16) capsid antigens in relation to detection of HPV-16 DNA and cervical lesions. *J Infect Dis* [Internet]. 2000 Apr; 181(4):1234–1239. Available from: <https://doi.org/10.1086/315364> PMID: 10753726
15. Dillner L, Bekassy Z, Jonsson N, Moreno-Lopez J, Blomberg J. Detection of IgA antibodies against human papillomavirus in cervical secretions from patients with cervical intraepithelial neoplasia. *Int J Cancer* [Internet]. 1989 Jan; 43(1):36–40. Available from: <https://doi.org/10.1002/ijc.2910430109> PMID: 2536005
16. Wang Z, Go BG, Hansson G, Forslund O, Dillner L, Sapp M, et al. Cervical Mucus Antibodies against Human Papillomavirus Type 16, 18, and 33 Capsids in Relation to Presence of Viral DNA [Internet]. Vol. 34, *JOURNAL OF CLINICAL MICROBIOLOGY*. 1996. Available from: <https://journals.asm.org/journal/jcm>.
17. Loimaranta V, Sievi K, Werner J, Pawlita M, Waterboer T, Butt J, et al. Comparison of multiplex-serology and ELISA based methods in detecting HPV16 L1 antibody responses in paired saliva and serum samples of healthy men. *J Virol Methods* [Internet]. 2019; 270:26–33. Available from: <http://europepmc.org/abstract/MED/31004663>. <https://doi.org/10.1016/j.jviromet.2019.04.007> PMID: 31004663
18. Cameron JE, Snowwhite I V., Chaturvedi AK, Hagensee ME. Human papillomavirus-specific antibody status in oral fluids modestly reflects serum status in human immunodeficiency virus-positive individuals. *Clin Diagn Lab Immunol*. 2003 Jun; 10(3):431–8.
19. Van Keer S, Willhauck-Fleckenstein M, Pattyn J, Butt J, Tjalma WAA, Van Ostade X, et al. First-void urine as a non-invasive liquid biopsy source to detect vaccine-induced human papillomavirus antibodies originating from cervicovaginal secretions. *J Clin Virol* [Internet]. 2019; 117:11–8. Available from: <https://pubmed.ncbi.nlm.nih.gov/31129514/>. <https://doi.org/10.1016/j.jcv.2019.05.004> PMID: 31129514

20. Pattyn J, Van Keer S, Téblick L, Van Damme P, Vorsters A. Non-invasive Assessment of Vaccine-Induced HPV Antibodies via First-Void Urine. *Front Immunol*. 2020; 11. <https://doi.org/10.3389/fimmu.2020.01657> PMID: 32849573
21. Vorsters A, Van Damme P, Bosch FX. HPV vaccination: Are we overlooking additional opportunities to control HPV infection and transmission? *International Journal of Infectious Diseases*. 2019; 88:110–2. <https://doi.org/10.1016/j.ijid.2019.09.006> PMID: 31521851
22. Schiller JT, Davies P. Delivering on the promise: HPV vaccines and cervical cancer. *Nat Rev Microbiol* [Internet]. 2004; 2(4):343–7. Available from: <https://www.nature.com/articles/nrmicro867>. <https://doi.org/10.1038/nrmicro867> PMID: 15031733
23. Wissing MD, Burchell AN, El-Zein M, Tellier PP, Coutlee F, Franco EL. Vaccination of young women decreases human papillomavirus transmission in heterosexual couples: Findings from the HITCH cohort study. *Cancer Epidemiology Biomarkers and Prevention*. 2019; 28(11):1825–34. <https://doi.org/10.1158/1055-9965.EPI-19-0618> PMID: 31488413
24. El-Zein M, Coutlée F, Tellier PP, Roger M, Franco EL, Burchell AN, et al. Human Papillomavirus Infection and Transmission Among Couples Through Heterosexual Activity (HITCH) Cohort Study: Protocol Describing Design, Methods, and Research Goals. *JMIR Res Protoc* [Internet]. 2019 Jan; 8(1):e11284. Available from: <https://europepmc.org/articles/PMC6352011>. <https://doi.org/10.2196/11284> PMID: 30650383
25. Maccosham A, El-Zein M, Burchell AN, Tellier PP, Coutlée F, Franco EL. Transmission reduction and prevention with HPV vaccination (TRAP-HPV) study protocol: A randomised controlled trial of the efficacy of HPV vaccination in preventing transmission of HPV infection in heterosexual couples. *BMJ Open*. 2020 Aug 11; 10(8). <https://doi.org/10.1136/bmjopen-2020-039383> PMID: 32788190
26. MacCosham A, El-Zein M, Burchell AN, Tellier PP, Coutlée F, Franco EL. Protection to Self and to One's Sexual Partner After Human Papillomavirus Vaccination: Preliminary Analysis From the Transmission Reduction And Prevention with HPV Vaccination Study. *Sex Transm Dis*. 2022; 49(6):414–22. <https://doi.org/10.1097/OLQ.0000000000001620> PMID: 35235550
27. Doorbar J. The E4 protein; structure, function and patterns of expression. *Virology*. 2013 Oct; 445(1–2):80–98. <https://doi.org/10.1016/j.virol.2013.07.008> PMID: 24016539
28. Doorbar J. Model systems of human papillomavirus-associated disease. Vol. 238, *Journal of Pathology*. John Wiley and Sons Ltd; 2016. p. 166–79.
29. Patterson NA, Smith JL, Ozburn MA. Human Papillomavirus Type 31b Infection of Human Keratinocytes Does Not Require Heparan Sulfate. *J Virol*. 2005 Jun; 79(11):6838–47. <https://doi.org/10.1128/JVI.79.11.6838-6847.2005> PMID: 15890923
30. Ozburn MA. Infectious human papillomavirus type 31b: purification and infection of an immortalized human keratinocyte cell line. Vol. 83, *Journal of General Virology*. 2002. <https://doi.org/10.1099/0022-1317-83-11-2753> PMID: 12388811
31. Biryukov J, Myers JC, McLaughlin-Drubin ME, Griffin HM, Milici J, Doorbar J, et al. Mutations in HPV18 E1~E4 impact virus capsid assembly, infectivity competence, and maturation. *Viruses*. 2017 Dec 19; 9(12).
32. Ozburn MA, Bondu V, Patterson NA, Sterk RT, Waxman AG, Bennett EC, et al. Infectious titres of human papillomaviruses (HPVs) in patient lesions, methodological considerations in evaluating HPV infectivity and implications for the efficacy of high-level disinfectants. *EBioMedicine*. 2021; 63:103165. <https://doi.org/10.1016/j.ebiom.2020.103165> PMID: 33422988
33. Broich G, Sasaki T. Electron microscopic detection of human papillomavirus particles in oral proliferative lesions. *Bull Tokyo Dent Coll* [Internet]. 1989 Nov; 30(4):213–220. Available from: <http://europepmc.org/abstract/MED/2561816>. PMID: 2561816
34. Hills E, Laverty CR. Electron microscopic detection of papilloma virus particles in selected koilocytotic cells in a routine cervical smear. *Acta Cytol* [Internet]. 1979; 23(1):53–56. Available from: <http://europepmc.org/abstract/MED/219647>.
35. Opalka DW, Matys K, Bojczuk PM, Green T, Gesser RM, Saah AJ, et al. Multiplexed Serologic Assay for Nine Anogenital Human Papillomavirus Types. *Clinical and Vaccine Immunology*. 2010; 17:818–27. <https://doi.org/10.1128/CVI.00348-09> PMID: 20237197
36. Agencia Estatal Boletín Oficial del Estado. BOE-A-2015-14082 Real Decreto 1090/2015, de 4 de diciembre, por el que se regulan los ensayos clínicos con medicamentos, los Comités de Ética de la Investigación con medicamentos y el Registro Español de Estudios Clínicos. [Internet]. 2015 [cited 2023 Mar 26]. Available from: <https://www.boe.es/eli/es/rd/2015/12/04/1090>.
37. European Medicines Agency. ICH E6 (R2) Good clinical practice—Scientific guideline [Internet]. 2018 [cited 2023 Mar 26]. Available from: <https://www.ema.europa.eu/en/ich-e6-r2-good-clinical-practice-scientific-guideline>.

38. Patel C, Brotherton JML, Pillsbury A, Jayasinghe S, Donovan B, Macartney K, et al. The impact of 10 years of human papillomavirus (HPV) vaccination in Australia: what additional disease burden will a nonavalent vaccine prevent? *Eurosurveillance* [Internet]. 2018 Aug;23. Available from: <https://www.eurosurveillance.org/content/10.2807/1560-7917.ES.2018.23.41.1700737>.
39. Markowitz LE, Naleway AL, Lewis RM, Crane B, Querec TD, Weinmann S, et al. Declines in HPV vaccine type prevalence in women screened for cervical cancer in the United States: Evidence of direct and herd effects of vaccination. *Vaccine* [Internet]. 2019; 37(29):3918–24. Available from: <https://www.sciencedirect.com/science/article/pii/S0264410X19306267>. <https://doi.org/10.1016/j.vaccine.2019.04.099> PMID: 31160099
40. Drolet M, Bénard É, Pérez N, Brisson M, Ali H, Boily MC, et al. Population-level impact and herd effects following the introduction of human papillomavirus vaccination programmes: updated systematic review and meta-analysis. *The Lancet* [Internet]. 2019; 394(10197):497–509. Available from: <https://www.sciencedirect.com/science/article/pii/S0140673619302983>. [https://doi.org/10.1016/S0140-6736\(19\)30298-3](https://doi.org/10.1016/S0140-6736(19)30298-3) PMID: 31255301
41. Hoes J, Woestenberg PJ, Bogaards JA, King AJ, de Melker HE, Berkhof J, et al. Population Impact of Girls-Only Human Papillomavirus 16/18 Vaccination in The Netherlands: Cross-Protective and Second-Order Herd Effects. *Clinical Infectious Diseases* [Internet]. 2021 Mar 1; 72(5):e103–11. Available from: <https://doi.org/10.1093/cid/ciaa1770> PMID: 33249475
42. Malagón T, Laurie C, Franco EL. Human papillomavirus vaccination and the role of herd effects in future cancer control planning: a review. *Expert Rev Vaccines* [Internet]. 2018; 17(5):395–409. Available from: <https://doi.org/10.1080/14760584.2018.1471986> PMID: 29715059
43. Nygård S, Nygård M, Orumaa M, Hansen BT. Quadrivalent HPV vaccine effectiveness against anogenital warts: A registry-based study of 2,2 million individuals. *Vaccine* [Internet]. 2023; 41(37):5469–76. Available from: <https://www.sciencedirect.com/science/article/pii/S0264410X23008526>. <https://doi.org/10.1016/j.vaccine.2023.07.031> PMID: 37516572
44. Brotons M, Monfil L, Roura E, Duarte-Salles T, Casabona J, Urbiztondo L, et al. Impact of a single-age cohort human papillomavirus vaccination strategy in Catalonia, Spain: Population-based analysis of anogenital warts in men and women. *Prev Med (Baltim)* [Internet]. 2020; 138:106166. Available from: <https://www.sciencedirect.com/science/article/pii/S0091743520301900>. <https://doi.org/10.1016/j.ypmed.2020.106166> PMID: 32565118
